# Supplementary material for: Nanozyme-mediated catalytic nanotherapy for inflammatory bowel disease
Source: PubMed Central journal article supplement — Theranostics. 2019 Apr 13;9(10):2843–55. doi: 10.7150/thno.33727 (PMC6568174; doi:10.7150/thno.33727), 2019-04-13
Supplement: thnov09p2843s1.pdf [file thnov09p2843s1.pdf]

# Nanozyme-mediated catalytic nanotherapy for inflammatory bowel disease

Jiulong Zhao,<sup>1,2‡</sup> Wei Gao,<sup>3‡</sup> Xiaojun Cai,<sup>1,3,\*</sup> Jiajia Xu<sup>2</sup>, Duowu Zou,<sup>2,\*</sup> Zhaoshen Li,<sup>2</sup> Bing Hu,<sup>3,\*</sup> Yuanyi Zheng,<sup>1,\*</sup>

<sup>1</sup>Shanghai Institute of Ultrasound in Medicine, Shanghai Jiao Tong University Affiliated Sixth People's Hospital, Shanghai 200233 (China)

<sup>2</sup>Department of Gastroenterology, Changhai Hospital, Second Military Medical University, Shanghai 200433 (China)

<sup>3</sup>Department of Ultrasound in Medicine, Shanghai Jiao Tong University Affiliated Sixth People's Hospital, Shanghai 200233 (China)

\*Corresponding authors: Dr. Xiaojun Cai, [c1x2j34@163.com](mailto:c1x2j34@163.com); Prof. Duowu Zou, [zdw\\_pi@163.com](mailto:zdw_pi@163.com); Prof. Bing Hu, [binghu\\_stephen@163.com](mailto:binghu_stephen@163.com); Prof. Yuanyi Zheng, [zhengyuanyi@163.com](mailto:zhengyuanyi@163.com);

<sup>‡</sup>These authors contributed equally to this work.

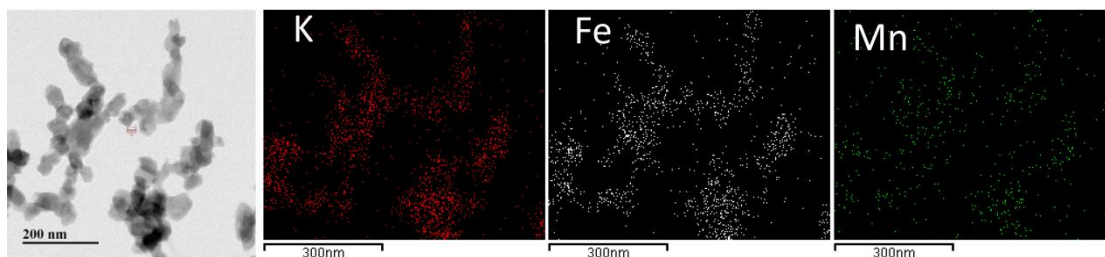

Figure S1. The element mapping of MPBZs

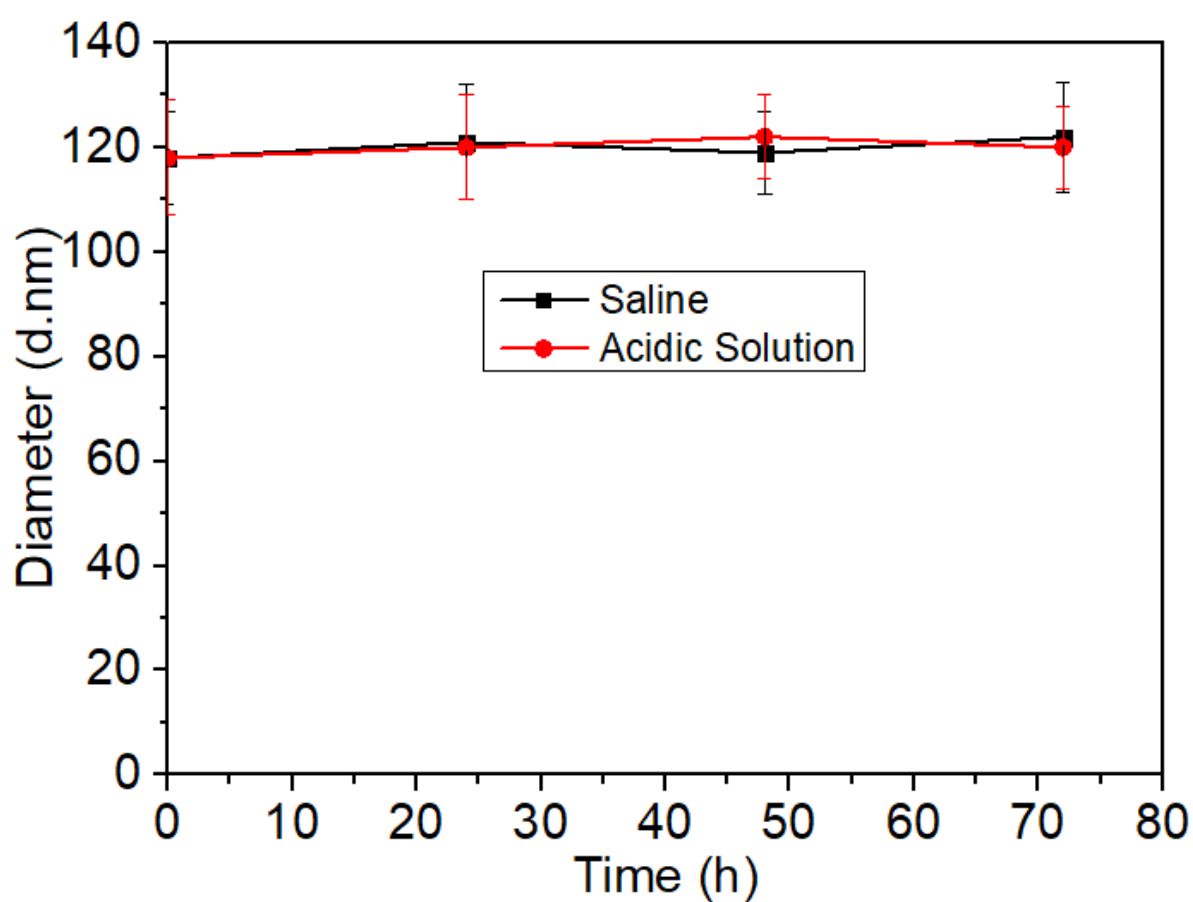

Figure S2. The hydrodynamic diameter of MPBZs in saline or acidic solutions of pH 1 at various times.

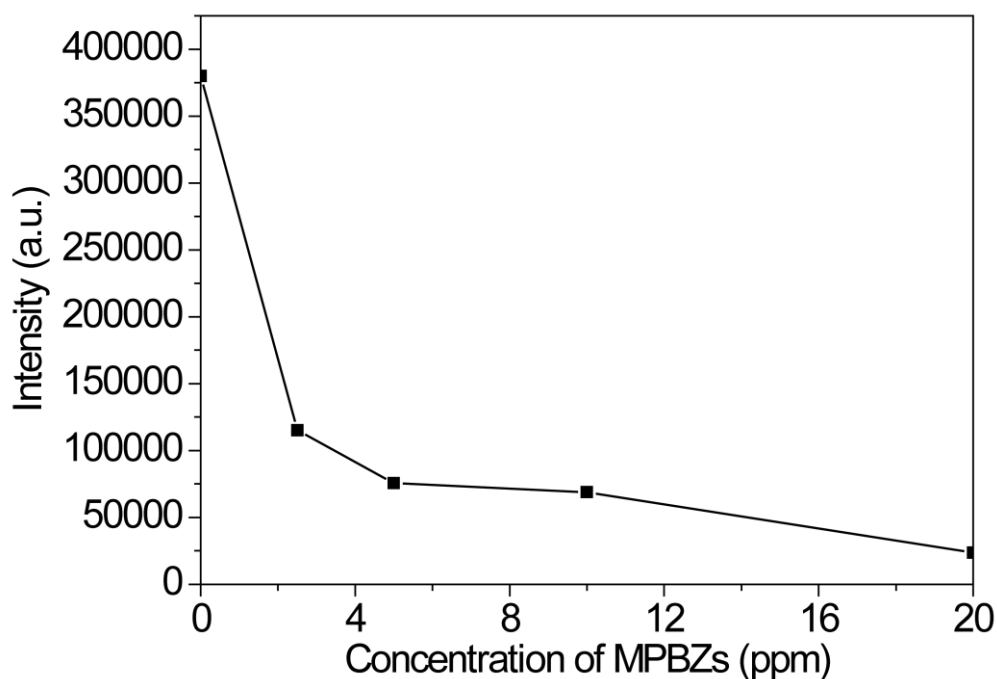

Figure S3. The curve of the corresponding second peak intensity of BMPO/ $\bullet$ OH. A typical ESR spectrum with a 1:2:2:1 intensity was obtained. Under UV irradiation (340 nm), commercial  $\text{TiO}_2$  powders generate  $\bullet$ OH. MPBZs at various concentrations (0, 2.5, 5, 10, and 20 mg/L) were added to 0.1 mg/mL  $\text{TiO}_2$  and 50 mM BMPO in quartz capillary tubes, and then placed in the ESR cavity after UV irradiation or no treatment.

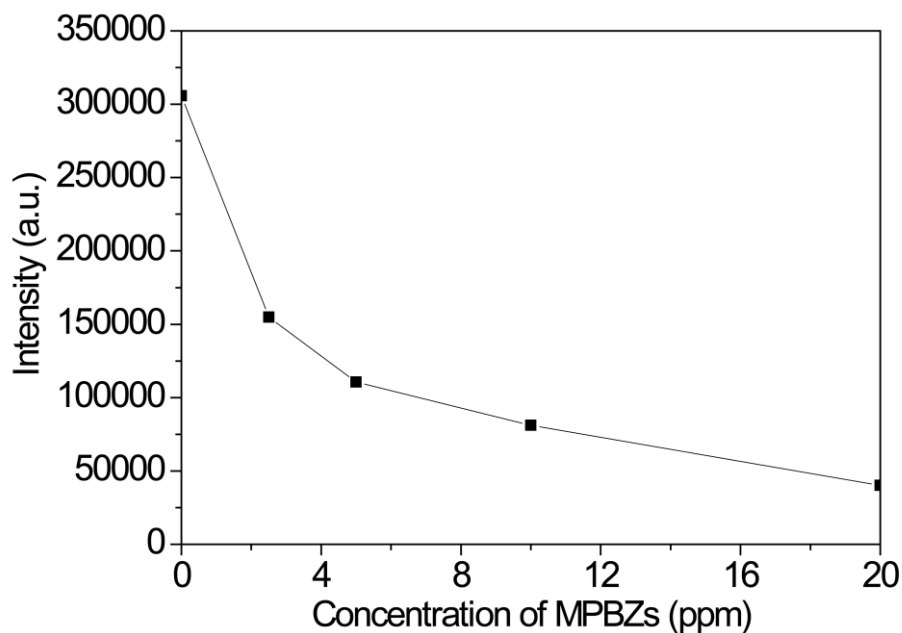

Figure S4. The curve of the corresponding second peak intensity of BMPO/ $\bullet$ OOH. BMPO (5-tert-butoxycarbonyl 5-methyl-1-pyrroline-N-oxide) was selected as the  $\text{O}_2^-$  trapping agent. MPBZs at various concentrations (0, 2.5, 5, 10, and 20 mg/L) were added into the xanthine and XOD system before an electron spin resonance test.

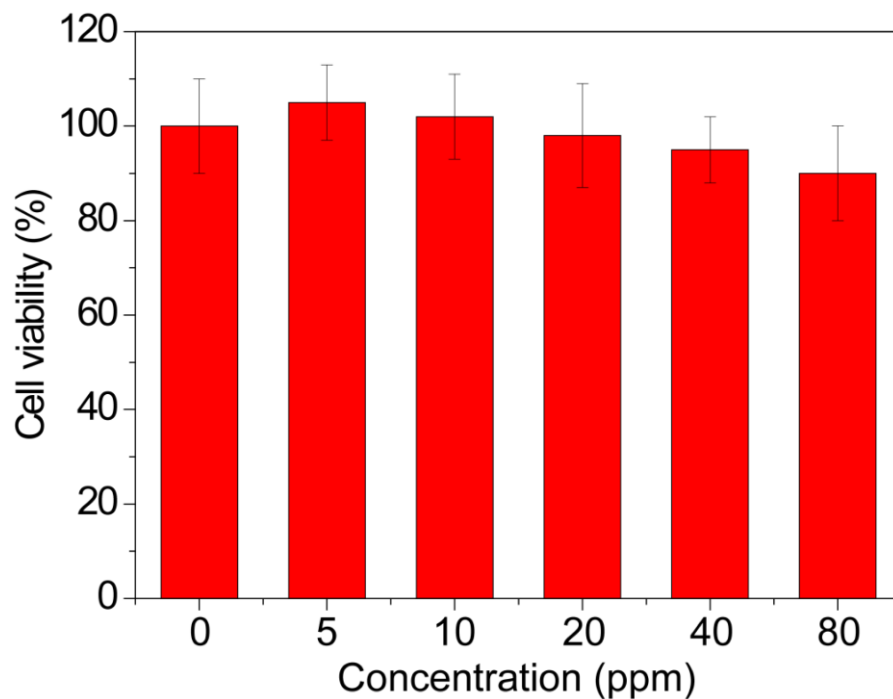

Figure S5. The cell viability of MPBZs with various concentrations.

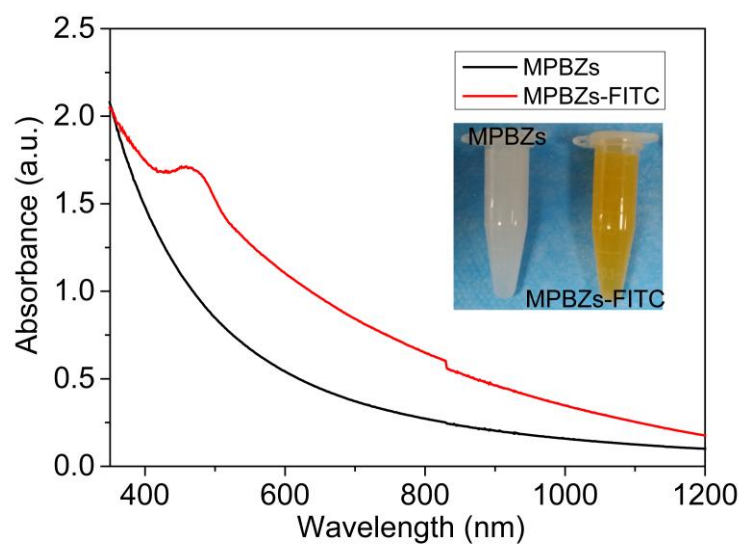

Figure S6. The UV-vis-NIR spectra of MPBZs before and after mixing with FITC.

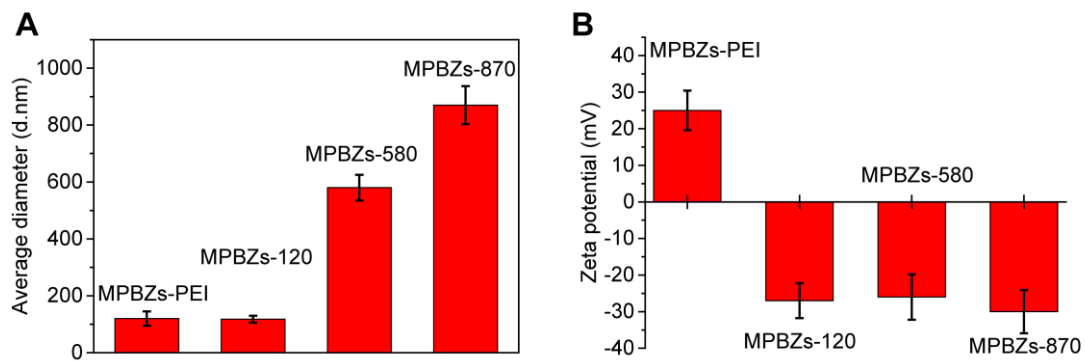

Figure S7. (a) The average hydrodynamic diameter and (b) zeta potential of four kinds of MPBZs with different size and surface charges.

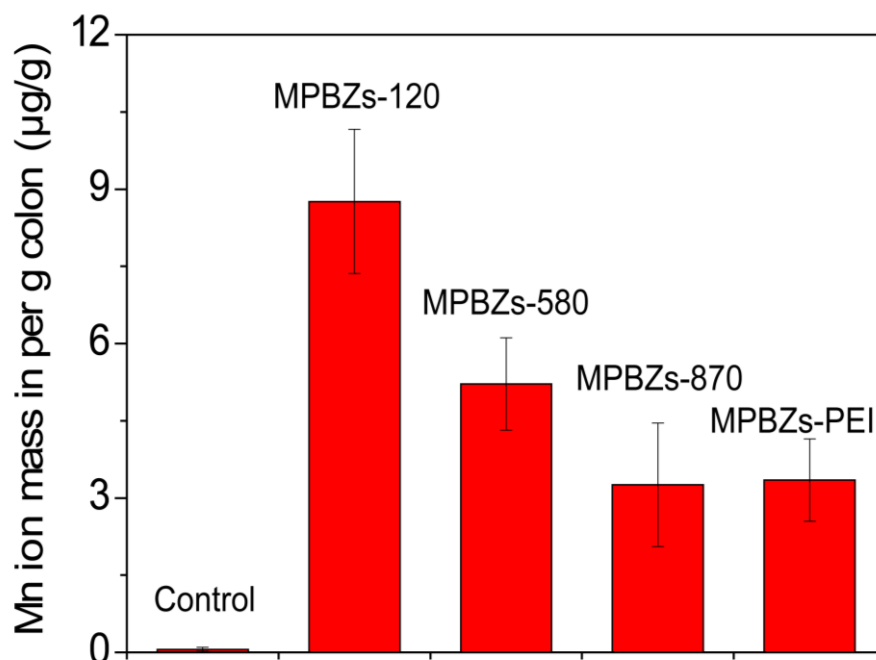

Figure S8. The accumulation of MPBZs at the inflamed mucosa among were investigated. Four kinds of MPBZs of different sizes and surface charges (the average hydrodynamic diameters of MPBZs with negative surface charges: 120 nm, 580 nm, and 870 nm; the average hydrodynamic diameter of MPBZs with positive surface charges: 118 nm).

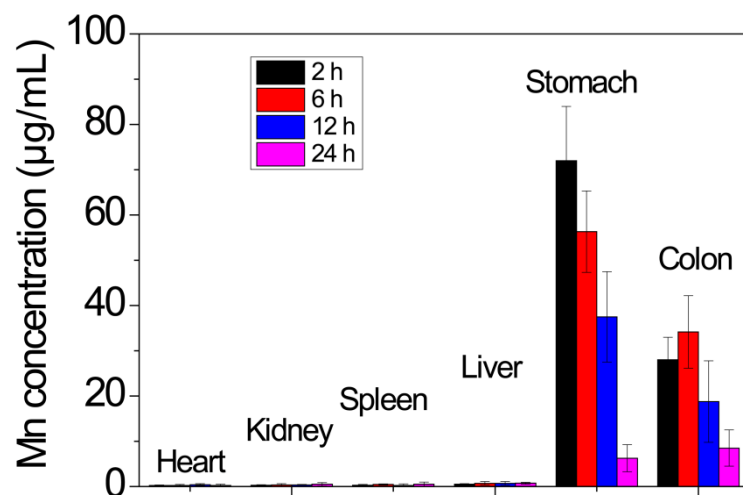

Figure S9. The distribution of MPBZs in IBD mice measured by ICP-OES.

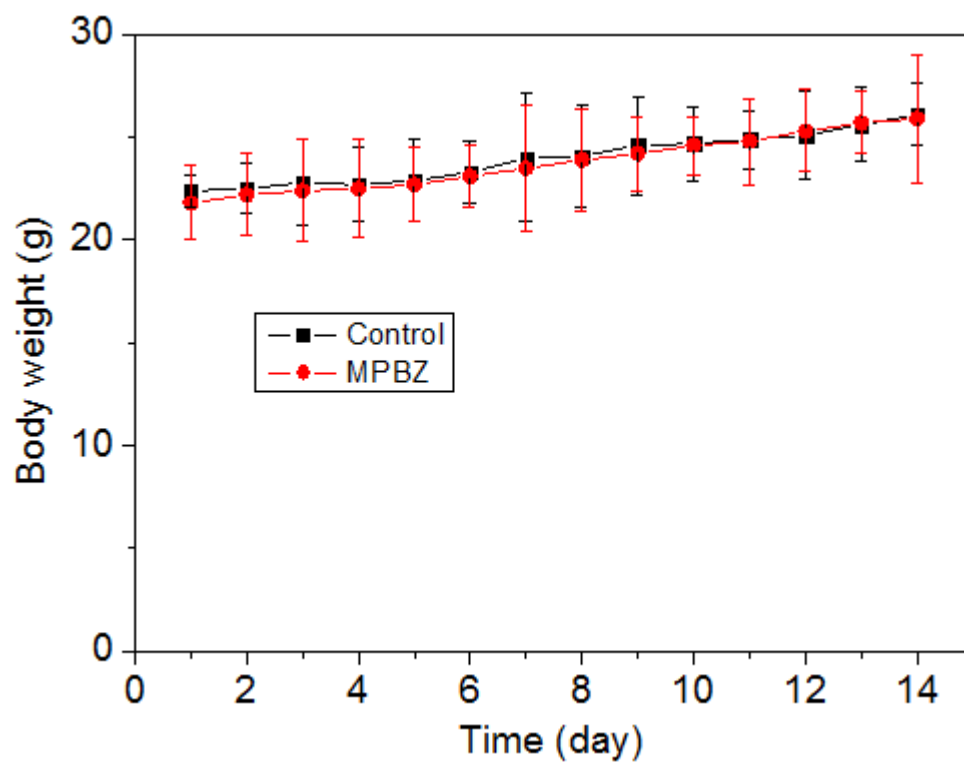

Figure S10. The body weight change of mice in control group and MPBZ-treated group.

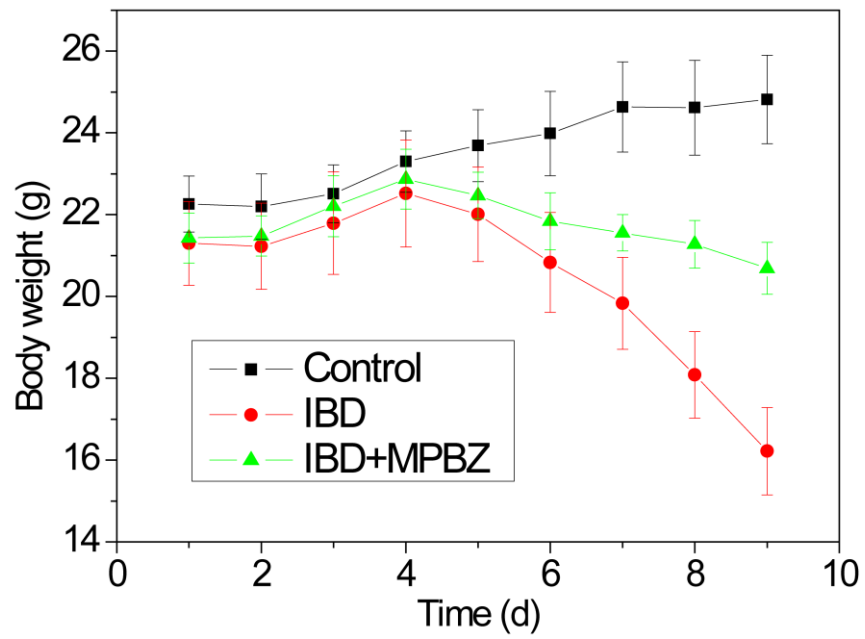

Figure S11. The body weight change of mice in various groups (Control, IBD, and IBD+MPBZ).

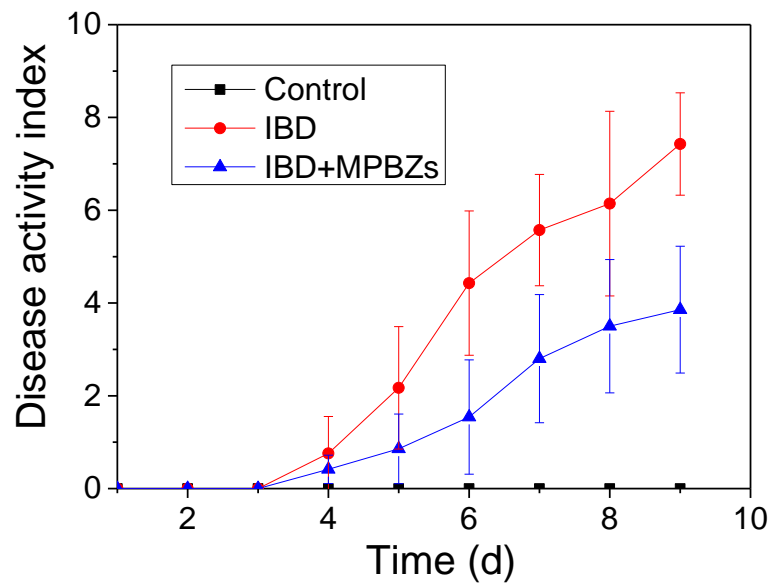

Figure S12. Changes of DAI of mice in various groups.

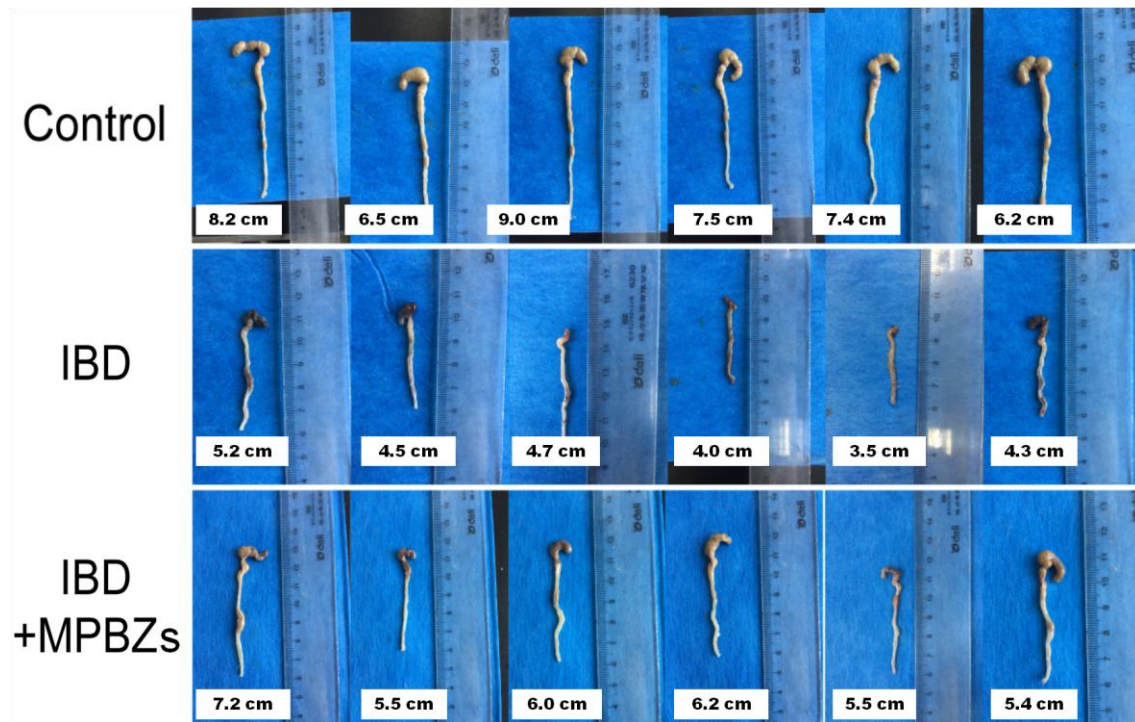

Figure S13. The images of colons of mice in various groups (Control, IBD, and IBD+MPBZs).

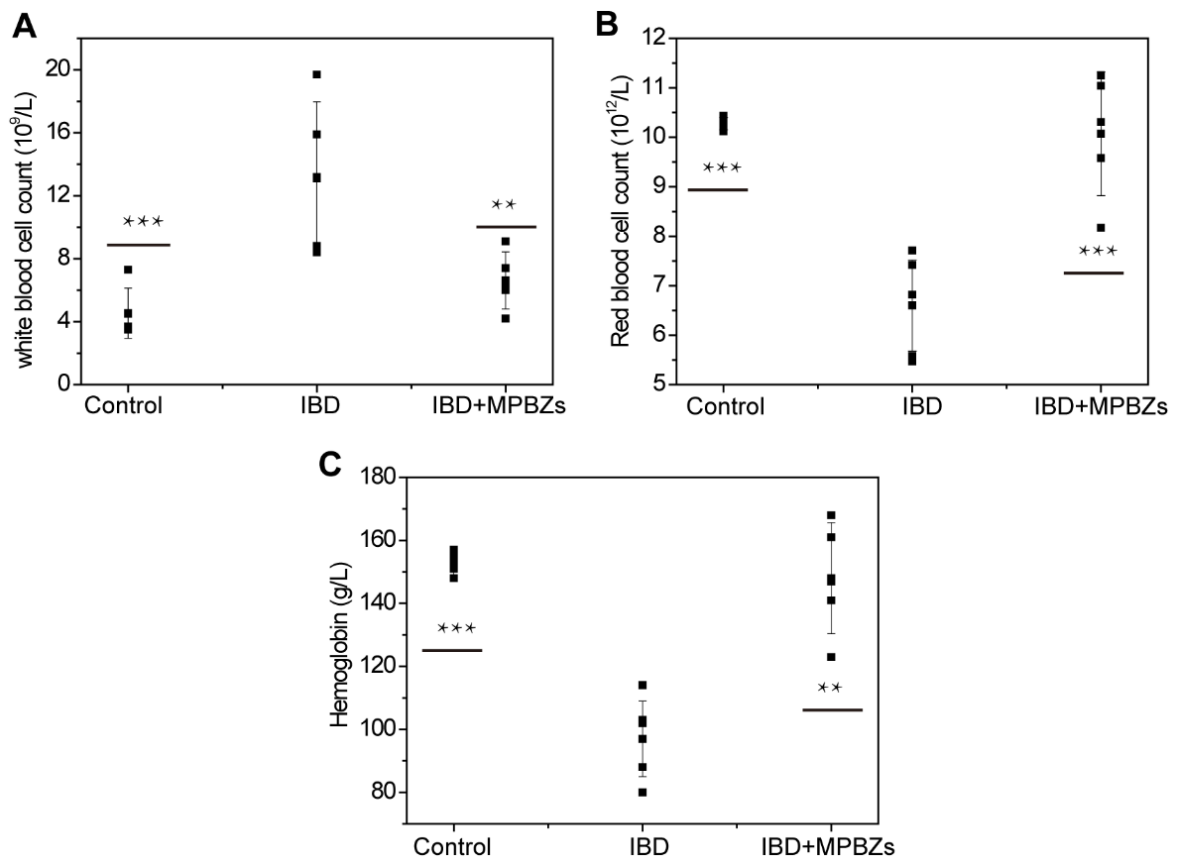

Figure S14. (a) white blood cell, (b) red blood cell, (c) Hematologic analyses including of mice from various groups (Control, IBD, and IBD+MPBZs).

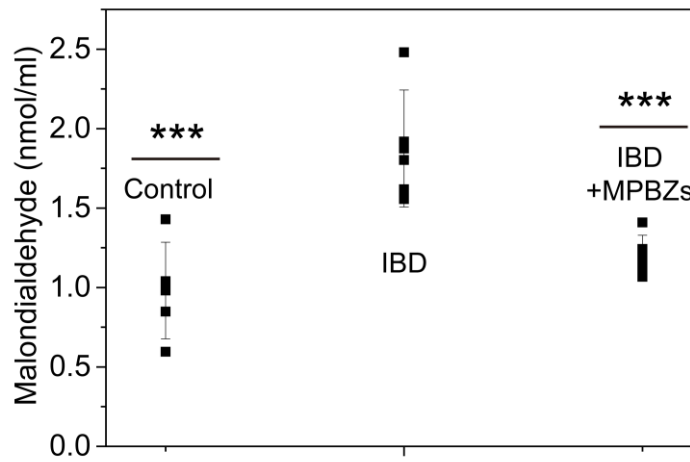

Figure S15. The levels of MDA activity in various groups (Control, IBD, and IBD+MPBZs).

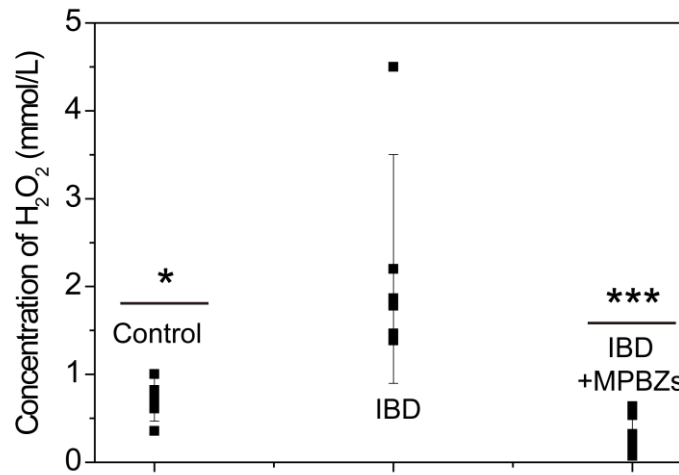

Figure S16. The intensity of H<sub>2</sub>O<sub>2</sub> in various groups (Control, IBD, and IBD+MPBZs).. The intensity of hydrogen peroxide in mice with colitis was  $2.20 \pm 0.58$  mmol/L, higher than that in control mice ( $0.71 \pm 0.11$  mmol/L), and was markedly reduced in the MPBZ-treated group ( $0.32 \pm 0.11$  mmol/L).

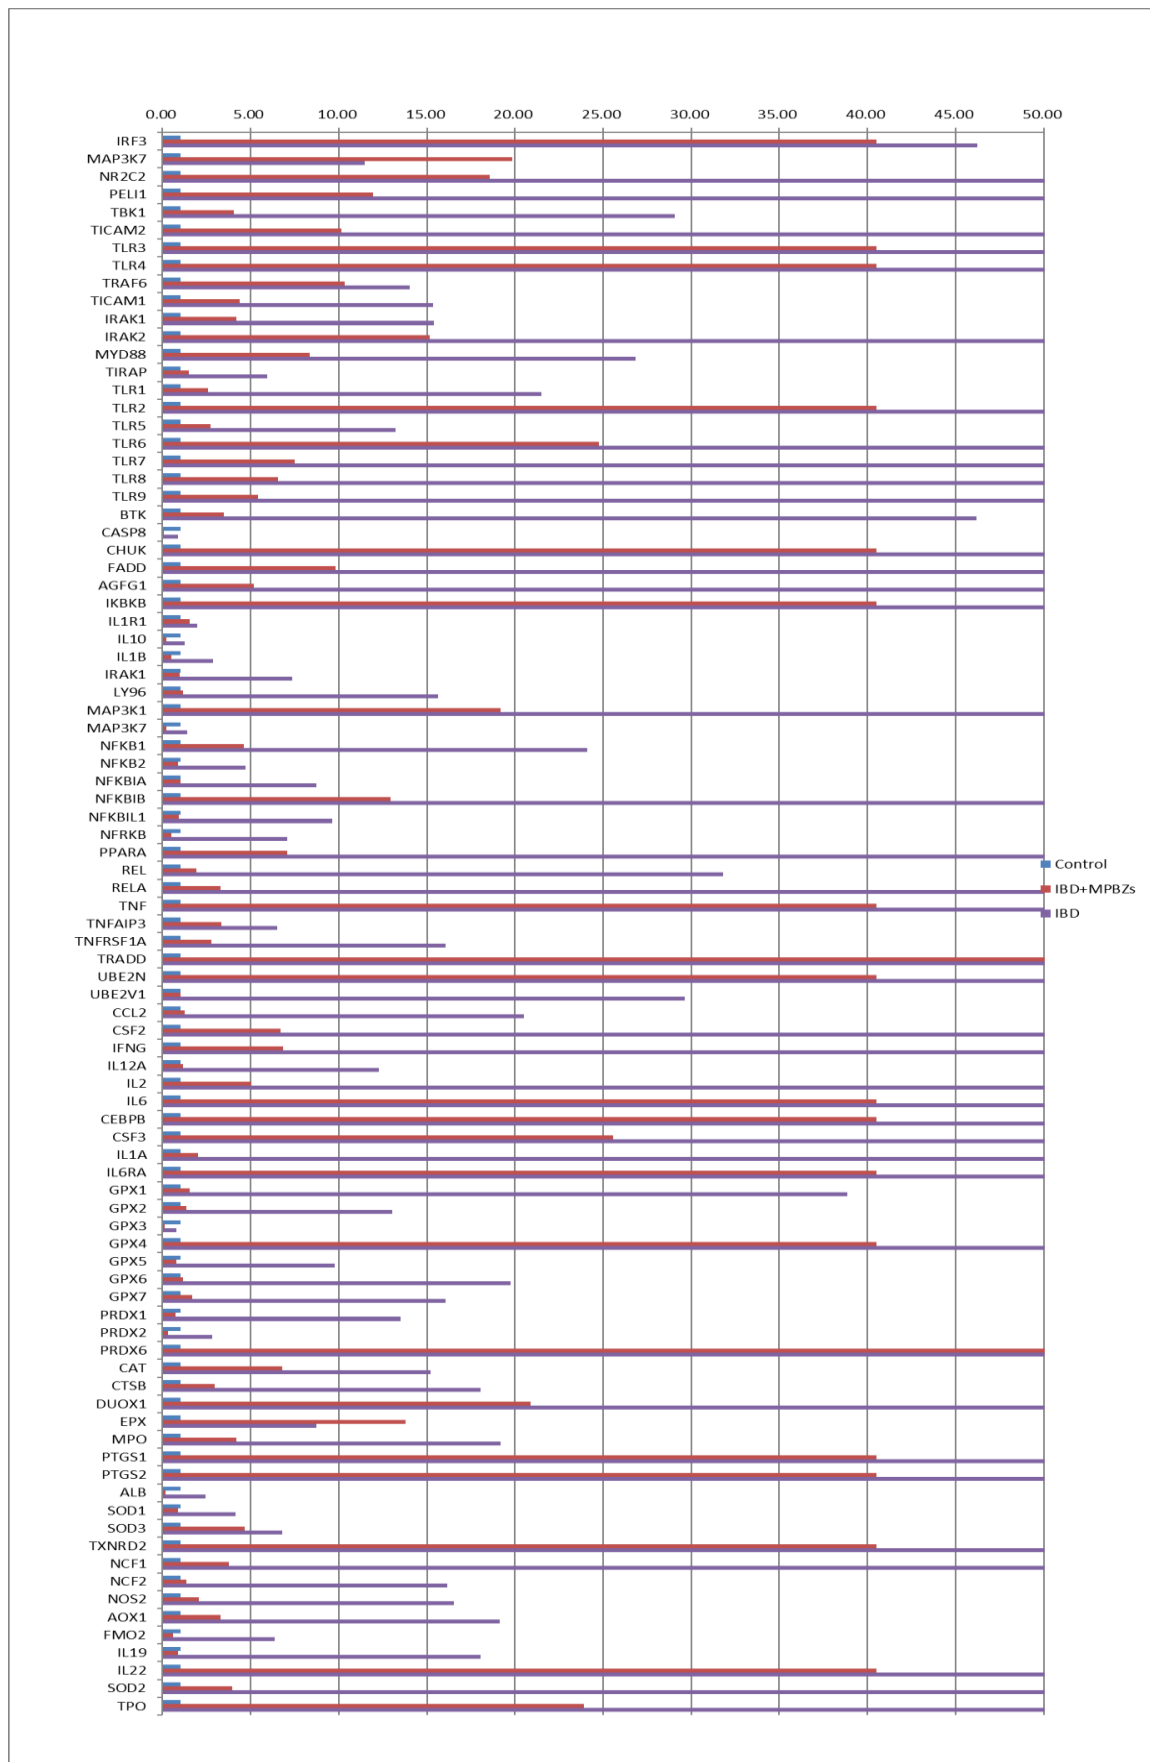

Figure S17. Cytokine profiles from a multiplexed cytokine assay of mice in the various groups (Control, IBD, and IBD+MPBZs).

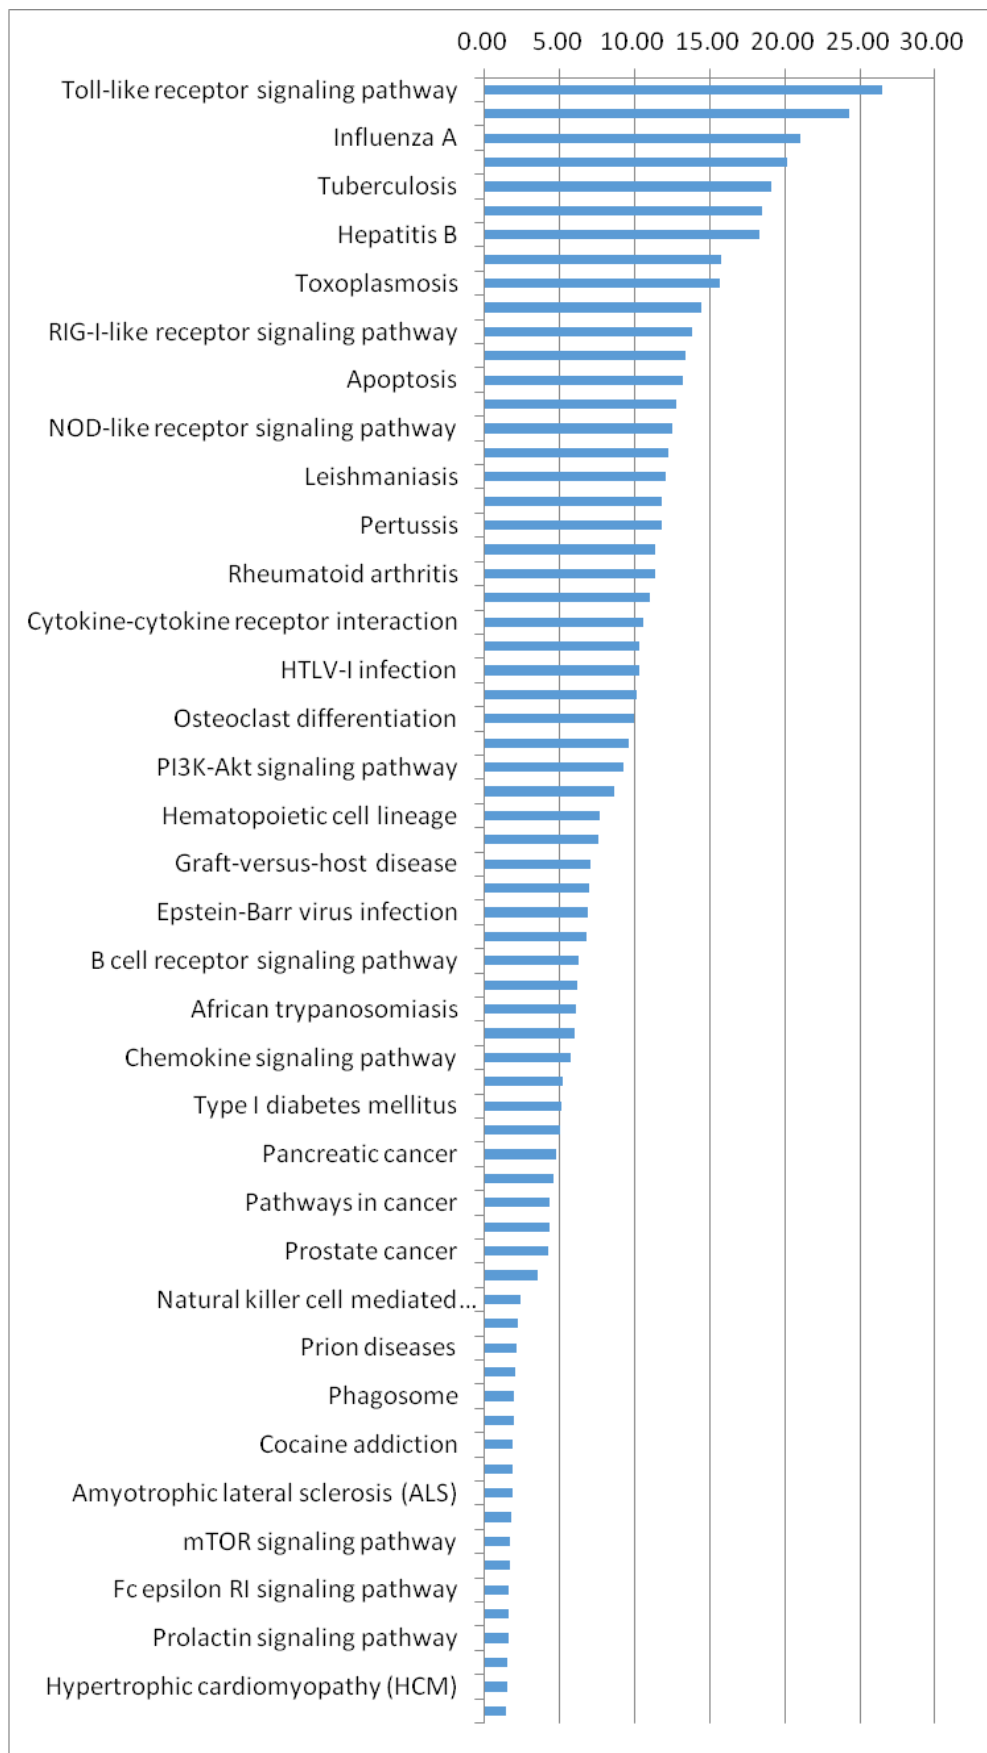

Figure S18. The KEGG pathway analysis of MPBZs on the DSS-induced colitis mice.

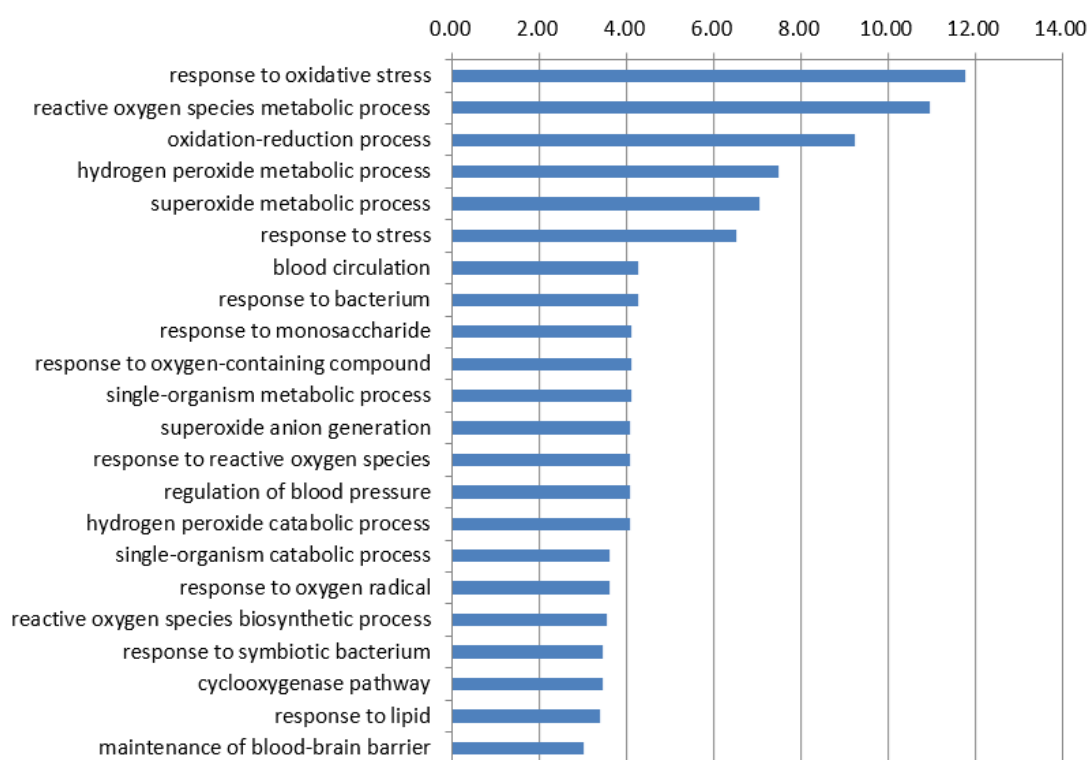

Figure S19. The GO analysis signaling pathway of MPBZs on the DSS-induced colitis mice.

| Number | Gene Name | RefSeq         |
|--------|-----------|----------------|
| 1      | IRF3      | NM_016849.4    |
| 2      | MAP3K7    | NM_009316.1    |
| 3      | NR2C2     | NM_001347342.1 |
| 4      | PELI1     | NM_023324.2    |
| 5      | TBK1      | NM_019786.4    |
| 6      | TICAM2    | NM_173394.3    |
| 7      | TLR3      | NM_126166.4    |
| 8      | TLR4      | NM_021297.2    |
| 9      | TRAF6     | NM_009424.3    |
| 10     | TICAM1    | NM_174989.4    |
| 11     | IRAK1     | NM_001177973.1 |
| 12     | IRAK2     | NM_001113553.1 |
| 13     | MYD88     | NM_010851.2    |
| 14     | TIRAP     | NM_001177845.1 |
| 15     | TLR1      | NM_030682.1    |
| 16     | TLR2      | NM_011905.3    |
| 17     | TLR5      | NM_016928.2    |
| 18     | TLR6      | NM_011604.3    |
| 19     | TLR7      | NM_133211.3    |
| 20     | TLR8      | NM_133212.2    |
| 21     | TLR9      | NM_031178.2    |
| 22     | BTK       | NM_013482.2    |
| 23     | CASP8     | NM_009812      |
| 24     | CHUK      | NM_001162410.1 |
| 25     | FADD      | NM_010175.5    |
| 26     | AGFG1     | NM_001310713.1 |
| 27     | IKBKB     | NM_001159774.1 |
| 28     | IL1R1     | NM_001123382.1 |
| 29     | IL10      | NM_010548.2    |
| 30     | IL1B      | NM_008361.3    |
| 31     | IRAK1     | NM_001177973.1 |
| 32     | LY96      | NM_001159711.1 |
| 33     | MAP3K1    | NM_011945.2    |
| 34     | MAP3K7    | NM_009316.1    |
| 35     | NFκB1     | NM_008689.2    |
| 36     | NFκB2     | NM_001177369.1 |
| 37     | NFκBIA    | NM_001105720.2 |
| 38     | NFκBIB    | NM_001306222.1 |
| 39     | NFκBIL1   | NM_010909.4    |
| 40     | NFRκB     | NM_172766.3    |
| 41     | PPARA     | NM_001113418.1 |
| 42     | REL       | NM_009044.2    |
| 43     | RELA      | NM_009045.4    |
| 44     | TNF       | NM_013693.2    |
| 45     | TNFAIP3   | NM_001166402.1 |
| 46     | TNFRSF1A  | NM_011609.4    |
| 47     | TRADD     | NM_001033161.2 |

|    |                |                |
|----|----------------|----------------|
| 48 | UBE2N          | NM_080560.3    |
| 49 | UBE2V1         | NM_001311131.1 |
| 50 | CCL2           | NM_011333.3    |
| 51 | CSF2           | NM_009969.4    |
| 52 | IFNG           | NM_008337.3    |
| 53 | IL12A          | NM_001159424.1 |
| 54 | IL2            | NM_008366.3    |
| 55 | IL6            | NM_031168.1    |
| 56 | CEBPB          | NM_024125.4    |
| 57 | CSF3           | NM_009971.1    |
| 58 | IL1A           | NM_010554.4    |
| 59 | IL6RA          | NM_001310676.1 |
| 60 | GPX1           | NM_008160.6    |
| 61 | GPX2           | NM_030677.2    |
| 62 | GPX3           | NM_008161.3    |
| 63 | GPX4           | NM_001037741.3 |
| 64 | GPX5           | NM_010343.2    |
| 65 | GPX6           | NM_145451.3    |
| 66 | GPX7           | NM_024198.3    |
| 67 | PRDX1          | NM_011034.4    |
| 68 | PRDX2          | NM_011563.5    |
| 69 | PRDX6          | NM_007453.3    |
| 70 | CAT            | NM_012520.1    |
| 71 | CTSB           | NM_007798.3    |
| 72 | DUOX1          | NM_001099297.1 |
| 73 | EPX            | NM_007946.2    |
| 74 | MPO            | NM_010824.2    |
| 75 | PTGS1          | NM_008969.4    |
| 76 | PTGS2          | NM_011198.3    |
| 77 | ALB            | NM_009654.4    |
| 78 | SOD1           | NM_011434.1    |
| 79 | SOD3           | NM_011435.3    |
| 80 | TXNRD2         | NM_013711.3    |
| 81 | NCF1           | NM_001286037.1 |
| 82 | NCF2           | NM_010877.5    |
| 83 | NOS2           | NM_010927.3    |
| 84 | AOX1           | NM_009676.2    |
| 85 | FMO2           | NM_018881.3    |
| 86 | IL19           | NM_001009940.1 |
| 87 | IL22           | NM_016971.2    |
| 88 | SOD2           | NM_013671.3    |
| 89 | TPO            | NM_009417.2    |
| 90 | $\beta$ -actin | NM_007393.5    |

**Table S1.** The Names and Reference Sequence (Ref Seq) from National Center for Biotechnology Information (NCBI) of target genes in inflammation-related and oxidation-related signaling pathways.

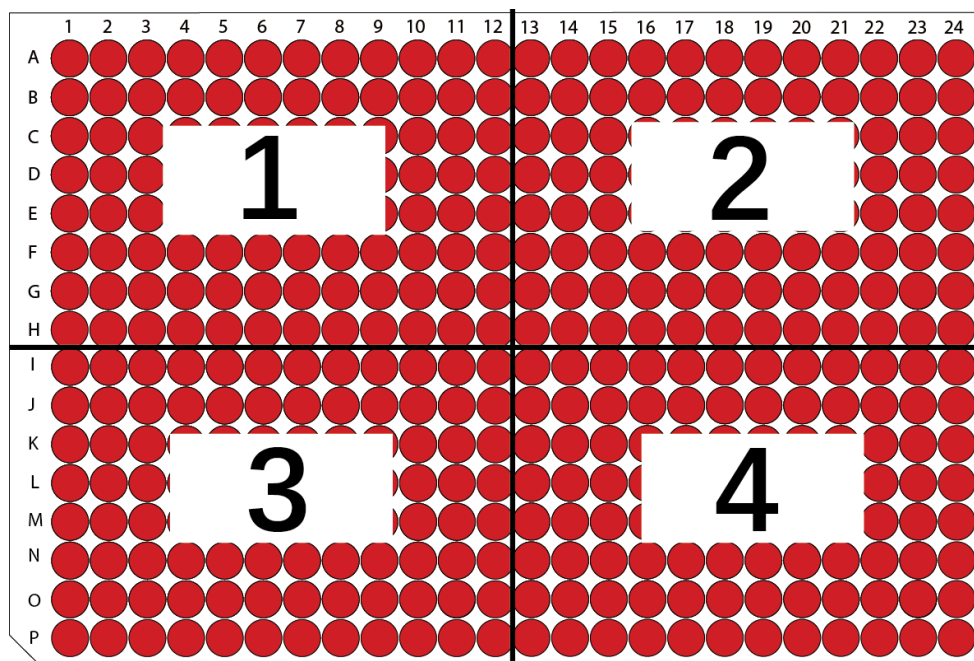

Scheme S1: PCR Array Diagram
